# Supplementary material for: Plasma Dephosphorylated-Uncarboxylated Matrix Gla-Protein in Systemic Sclerosis Patients: Biomarker Potential for Vascular Calcification and Inflammation
Source: MDPI journal article supplement (doi:10.3390/diagnostics13233526), 2023-11-24
Supplement: s1 [file s1]

**Table S1.** Clinical characteristics of the validation cohort of SSc patients ( $n = 29$ ).

| Clinical Features                          | SSc Cohort<br>$n = 29$ |
|--------------------------------------------|------------------------|
| Age at inclusion, mean $\pm$ SD, y         | 60.3 (13.3)            |
| Female sex                                 | 22 (75.9)              |
| Disease duration, median, IQR, y           | 1.0 (6.9)              |
| Skin involvement                           |                        |
| Limited                                    | 21 (72.4)              |
| Diffuse                                    | 5 (17.2)               |
| Sine sclerosis                             | 3 (10.3)               |
| Antibody                                   |                        |
| Centromere                                 | 18 (62.1)              |
| Topoisomerase I                            | 6 (20.7)               |
| RNA polymerase III                         | 1 (3.4)                |
| Other (Ku, Pm-ScL)                         | 2 (6.9)                |
| ANA only                                   | 2 (6.9)                |
| Digital ulcers                             | 11 (37.9)              |
| ILD                                        | 11 (37.9)              |
| Pulmonary hypertension                     | 2 (6.9)                |
| Immunosuppressive therapy                  | 0                      |
| Creatinine, median, IQR, $\mu\text{mol/L}$ | 77 (26)                |
| CRP median, IQR, $\text{mg/L}$             | 2.0 (3.0)              |
| sIL2r, median, IQR, $\text{U/mL}$          | 453 (417)              |
| dp-ucMGP, median, IQR, $\text{pmol/L}$     | 589 (370)              |
| CVD at baseline                            | 5 (17.2)               |

Data are presented as numbers (%) unless otherwise indicated. IQR: interquartile range; ILD: interstitial lung disease; ANA: anti-nuclear antibodies; CRP: c-reactive protein. sIL2r: soluble interleukin 2 receptor. Dp-ucMGP: Dephosphorylated and uncarboxylated Matrix Gla Protein. ¥ Defined as the date of the first non-Raynaud's phenomenon symptom. Reference ranges for creatinine are 60–115  $\mu\text{mol/L}$ , CRP < 10  $\text{mg/L}$ , and sIL2r < 600  $\text{U/mL}$ .
